# Supplementary material for: Consensus on the Clinical Approach to Moderate-to-Severe Atopic Dermatitis in Spain: A Delphi Survey
Source: Hindawi journal article supplement (doi:10.1155/2020/1524293), 2020-04-07
Supplement: f1 [file 1524293.f1.pdf]

## Study questionnaire

### Section 1: Definition and diagnosis (14 items)

| Item                                                                                                                                                                                                           | Level of agreement                                                                                                                     |
|----------------------------------------------------------------------------------------------------------------------------------------------------------------------------------------------------------------|----------------------------------------------------------------------------------------------------------------------------------------|
| – AD can also develop <i>de novo</i> in adults or young adults, or even in advanced age                                                                                                                        | <input type="checkbox"/> 1 <input type="checkbox"/> 2 <input type="checkbox"/> 3 <input type="checkbox"/> 4 <input type="checkbox"/> 5 |
| – AD is a multifaceted disease that is derived from the interactions of multiple factors, including the skin components (cellular and extracellular components that form the skin barrier)                     | <input type="checkbox"/> 1 <input type="checkbox"/> 2 <input type="checkbox"/> 3 <input type="checkbox"/> 4 <input type="checkbox"/> 5 |
| – AD is a multifaceted disease that is derived from the interactions of multiple factors, including the immune system (innate and adaptative)                                                                  | <input type="checkbox"/> 1 <input type="checkbox"/> 2 <input type="checkbox"/> 3 <input type="checkbox"/> 4 <input type="checkbox"/> 5 |
| – AD is a multifaceted disease that is derived from the interactions of multiple factors, including the skin microbiome                                                                                        | <input type="checkbox"/> 1 <input type="checkbox"/> 2 <input type="checkbox"/> 3 <input type="checkbox"/> 4 <input type="checkbox"/> 5 |
| – AD is a multifaceted disease that is derived from the interactions of multiple factors, including genetic factors                                                                                            | <input type="checkbox"/> 1 <input type="checkbox"/> 2 <input type="checkbox"/> 3 <input type="checkbox"/> 4 <input type="checkbox"/> 5 |
| – AD is a multifaceted disease that is derived from the interactions of multiple factors, including environmental factors                                                                                      | <input type="checkbox"/> 1 <input type="checkbox"/> 2 <input type="checkbox"/> 3 <input type="checkbox"/> 4 <input type="checkbox"/> 5 |
| – Currently, the diagnosis and assessment of the severity of AD are made on clinical grounds                                                                                                                   | <input type="checkbox"/> 1 <input type="checkbox"/> 2 <input type="checkbox"/> 3 <input type="checkbox"/> 4 <input type="checkbox"/> 5 |
| – The clinical criteria defined by Hanifin and Rajka are used for the clinical diagnosis of AD                                                                                                                 | <input type="checkbox"/> 1 <input type="checkbox"/> 2 <input type="checkbox"/> 3 <input type="checkbox"/> 4 <input type="checkbox"/> 5 |
| – The clinical presentation of AD depends on the age of the patients                                                                                                                                           | <input type="checkbox"/> 1 <input type="checkbox"/> 2 <input type="checkbox"/> 3 <input type="checkbox"/> 4 <input type="checkbox"/> 5 |
| – With greater frequency, children < 2 years of age and adults present involvement of the face and neck, in addition, adults also present involvement of the flexor and extensor surfaces                      | <input type="checkbox"/> 1 <input type="checkbox"/> 2 <input type="checkbox"/> 3 <input type="checkbox"/> 4 <input type="checkbox"/> 5 |
| – Some forms of presentation seen in adults include, for example, dermatitis of the head and neck, chronic eczema of the hands and multiple zones of lichenification or prurigo                                | <input type="checkbox"/> 1 <input type="checkbox"/> 2 <input type="checkbox"/> 3 <input type="checkbox"/> 4 <input type="checkbox"/> 5 |
| – The classification of “intrinsic” AD (not associated with IgE) and “extrinsic” AD (associated with IgE) has practical implications related to specific avoidance strategies in the management of the disease | <input type="checkbox"/> 1 <input type="checkbox"/> 2 <input type="checkbox"/> 3 <input type="checkbox"/> 4 <input type="checkbox"/> 5 |
| – The blood eosinophil count is not a useful biomarker in AD                                                                                                                                                   | <input type="checkbox"/> 1 <input type="checkbox"/> 2 <input type="checkbox"/> 3 <input type="checkbox"/> 4 <input type="checkbox"/> 5 |
| – Currently there are no validated biomarkers that help in the diagnosis of AD                                                                                                                                 | <input type="checkbox"/> 1 <input type="checkbox"/> 2 <input type="checkbox"/> 3 <input type="checkbox"/> 4 <input type="checkbox"/> 5 |

AD: atopic dermatitis, IgE: immunoglobulin E

### Section 2: Differential diagnosis (1 item)

| Item                                                                                                                                                                                      | Level of agreement                                                                                                                     |
|-------------------------------------------------------------------------------------------------------------------------------------------------------------------------------------------|----------------------------------------------------------------------------------------------------------------------------------------|
| – In certain situations, skin biopsy should be considered to exclude other conditions, such as early stage T-cell cutaneous lymphoma, psoriasis or dermatitis herpetiformis, among others | <input type="checkbox"/> 1 <input type="checkbox"/> 2 <input type="checkbox"/> 3 <input type="checkbox"/> 4 <input type="checkbox"/> 5 |

### Section 3: Severity of AD (2 items)

| Item                                                                                                                                                                                     | Level of agreement                                                                                                                     |
|------------------------------------------------------------------------------------------------------------------------------------------------------------------------------------------|----------------------------------------------------------------------------------------------------------------------------------------|
| – The SCORAD index is used to quantify the severity of the disease in order to assess the comparative efficacy of treatments and progression of the disease in routine clinical practice | <input type="checkbox"/> 1 <input type="checkbox"/> 2 <input type="checkbox"/> 3 <input type="checkbox"/> 4 <input type="checkbox"/> 5 |
| – The EASI score is a validated scale that is not used in routine clinical practice                                                                                                      | <input type="checkbox"/> 1 <input type="checkbox"/> 2 <input type="checkbox"/> 3 <input type="checkbox"/> 4 <input type="checkbox"/> 5 |

AD: atopic dermatitis; SCORAD: scoring atopic dermatitis; EASI: eczema area and severity index.

## Section 4: Etiology and physiopathology (4 items)

| Item                                                                                                                        | Level of agreement                                                                                                                     |
|-----------------------------------------------------------------------------------------------------------------------------|----------------------------------------------------------------------------------------------------------------------------------------|
| – A high percentage of patients with AD also present food allergy, allergic rhinitis or asthma                              | <input type="checkbox"/> 1 <input type="checkbox"/> 2 <input type="checkbox"/> 3 <input type="checkbox"/> 4 <input type="checkbox"/> 5 |
| – Treatments oriented to increase filaggrin expression are useful in the management of AD in a particular group of patients | <input type="checkbox"/> 1 <input type="checkbox"/> 2 <input type="checkbox"/> 3 <input type="checkbox"/> 4 <input type="checkbox"/> 5 |
| – Currently there is an unmet need in the treatment of moderate-severe AD                                                   | <input type="checkbox"/> 1 <input type="checkbox"/> 2 <input type="checkbox"/> 3 <input type="checkbox"/> 4 <input type="checkbox"/> 5 |
| – Biologic drugs are especially promising for adult patients with moderate or severe forms of the disease                   | <input type="checkbox"/> 1 <input type="checkbox"/> 2 <input type="checkbox"/> 3 <input type="checkbox"/> 4 <input type="checkbox"/> 5 |

AD: atopic dermatitis.

## Section 5: Comorbidities of AD (4 items)

| Item                                                                                                                                                                                                    | Level of agreement                                                                                                                     |
|---------------------------------------------------------------------------------------------------------------------------------------------------------------------------------------------------------|----------------------------------------------------------------------------------------------------------------------------------------|
| – AD in adults is frequently associated with allergic comorbidities                                                                                                                                     | <input type="checkbox"/> 1 <input type="checkbox"/> 2 <input type="checkbox"/> 3 <input type="checkbox"/> 4 <input type="checkbox"/> 5 |
| – AD in children is frequently associated with allergic comorbidities                                                                                                                                   | <input type="checkbox"/> 1 <input type="checkbox"/> 2 <input type="checkbox"/> 3 <input type="checkbox"/> 4 <input type="checkbox"/> 5 |
| – The relative risk of suffering immune-mediated inflammatory diseases such as rheumatoid arthritis and chronic inflammatory bowel disease is higher in patients with AD than in the general population | <input type="checkbox"/> 1 <input type="checkbox"/> 2 <input type="checkbox"/> 3 <input type="checkbox"/> 4 <input type="checkbox"/> 5 |
| – Children with AD are more prone to suffer from mental disorders such as depression, anxiety, behavior disorders, among others                                                                         | <input type="checkbox"/> 1 <input type="checkbox"/> 2 <input type="checkbox"/> 3 <input type="checkbox"/> 4 <input type="checkbox"/> 5 |

AD: atopic dermatitis.

## Section 6: Health-related quality of life (2 items)

| Item                                                                                                                                                                                     | Level of agreement                                                                                                                     |
|------------------------------------------------------------------------------------------------------------------------------------------------------------------------------------------|----------------------------------------------------------------------------------------------------------------------------------------|
| – AD causes considerable psychological anxiety and results in a dramatic impact on the quality of life both for patients and their families                                              | <input type="checkbox"/> 1 <input type="checkbox"/> 2 <input type="checkbox"/> 3 <input type="checkbox"/> 4 <input type="checkbox"/> 5 |
| – The usefulness of PO-SCORAD for the self-assessment of AD in children suggests the importance of integrating the perspectives of the physician and the patient in the management of AD | <input type="checkbox"/> 1 <input type="checkbox"/> 2 <input type="checkbox"/> 3 <input type="checkbox"/> 4 <input type="checkbox"/> 5 |

AD: atopic dermatitis; PO-SCORAD: patient-oriented SCORAD.

## Section 7: Treatment and follow-up (19 items)

| Item                                                                                                                                                                                           | Level of agreement                                                                                                                     |
|------------------------------------------------------------------------------------------------------------------------------------------------------------------------------------------------|----------------------------------------------------------------------------------------------------------------------------------------|
| Substances that should be avoided                                                                                                                                                              |                                                                                                                                        |
| – When the prick test is positive for any allergen with suspicion of clinical involvement, avoidance of these allergens as far as possible may be a useful complementary measure               | <input type="checkbox"/> 1 <input type="checkbox"/> 2 <input type="checkbox"/> 3 <input type="checkbox"/> 4 <input type="checkbox"/> 5 |
| – Patients with moderate-to-severe AD should follow a diet that does not include foods testing positive in the prick test or prick-prick test and that are clinically relevant for the patient | <input type="checkbox"/> 1 <input type="checkbox"/> 2 <input type="checkbox"/> 3 <input type="checkbox"/> 4 <input type="checkbox"/> 5 |
| Topical anti-inflammatory treatment                                                                                                                                                            |                                                                                                                                        |
| – The use of wet wraps increases the effect of topical corticosteroids                                                                                                                         | <input type="checkbox"/> 1 <input type="checkbox"/> 2 <input type="checkbox"/> 3 <input type="checkbox"/> 4 <input type="checkbox"/> 5 |
| – Proactive "treatment", for example, application two times per week in long-term follow-up, can help reduce new flares                                                                        | <input type="checkbox"/> 1 <input type="checkbox"/> 2 <input type="checkbox"/> 3 <input type="checkbox"/> 4 <input type="checkbox"/> 5 |
| – Proactive "treatment" with application of tacrolimus ointment two times per week can help reduce new flares                                                                                  | <input type="checkbox"/> 1 <input type="checkbox"/> 2 <input type="checkbox"/> 3 <input type="checkbox"/> 4 <input type="checkbox"/> 5 |
| – Simultaneous combination on the same location of topical glucocorticoids and topical calcineurin inhibitors does not seem to be useful                                                       | <input type="checkbox"/> 1 <input type="checkbox"/> 2 <input type="checkbox"/> 3 <input type="checkbox"/> 4 <input type="checkbox"/> 5 |
| – Based on results of clinical trials of crisaborole, this is not the treatment of choice for severe AD                                                                                        | <input type="checkbox"/> 1 <input type="checkbox"/> 2 <input type="checkbox"/> 3 <input type="checkbox"/> 4 <input type="checkbox"/> 5 |
| Antipruritic treatment                                                                                                                                                                         |                                                                                                                                        |
| – There are no sufficient bibliographic references supporting the general use of first- and second-generation antihistamines for treating pruritus in AD                                       | <input type="checkbox"/> 1 <input type="checkbox"/> 2 <input type="checkbox"/> 3 <input type="checkbox"/> 4 <input type="checkbox"/> 5 |
| – First- and second-generation antihistamines, in general, are not useful for                                                                                                                  | <input type="checkbox"/> 1 <input type="checkbox"/> 2 <input type="checkbox"/> 3 <input type="checkbox"/> 4 <input type="checkbox"/> 5 |

|                                                                                                                                                                                                     |                                                                                                                                        |
|-----------------------------------------------------------------------------------------------------------------------------------------------------------------------------------------------------|----------------------------------------------------------------------------------------------------------------------------------------|
| systemic treatment of AD                                                                                                                                                                            |                                                                                                                                        |
| Allergen-specific immunotherapy (allergen-SIT)                                                                                                                                                      |                                                                                                                                        |
| – Allergen-SIT has positive effects in some sensitized patients with AD                                                                                                                             | <input type="checkbox"/> 1 <input type="checkbox"/> 2 <input type="checkbox"/> 3 <input type="checkbox"/> 4 <input type="checkbox"/> 5 |
| – AD is not a contraindication for the use of immunotherapy in patients with allergic respiratory diseases (allergic rhinoconjunctivitis, allergic bronchial asthma)                                | <input type="checkbox"/> 1 <input type="checkbox"/> 2 <input type="checkbox"/> 3 <input type="checkbox"/> 4 <input type="checkbox"/> 5 |
| Systemic treatments                                                                                                                                                                                 |                                                                                                                                        |
| – With the current immune response modifiers, the therapeutic needs of patients with severe AD are not sufficiently covered                                                                         | <input type="checkbox"/> 1 <input type="checkbox"/> 2 <input type="checkbox"/> 3 <input type="checkbox"/> 4 <input type="checkbox"/> 5 |
| – In the treatment of severe AD, cyclosporine has an adequate risk-benefit ratio                                                                                                                    | <input type="checkbox"/> 1 <input type="checkbox"/> 2 <input type="checkbox"/> 3 <input type="checkbox"/> 4 <input type="checkbox"/> 5 |
| – With phototherapy, the therapeutic needs of patients with severe AD are not sufficiently covered                                                                                                  | <input type="checkbox"/> 1 <input type="checkbox"/> 2 <input type="checkbox"/> 3 <input type="checkbox"/> 4 <input type="checkbox"/> 5 |
| – In the treatment of severe AD, phototherapy has an adequate risk-benefit ratio                                                                                                                    | <input type="checkbox"/> 1 <input type="checkbox"/> 2 <input type="checkbox"/> 3 <input type="checkbox"/> 4 <input type="checkbox"/> 5 |
| New systemic treatments                                                                                                                                                                             |                                                                                                                                        |
| – Treatment with biologics should be considered in patients with severe AD not controlled with conventional systemic and topical treatment                                                          | <input type="checkbox"/> 1 <input type="checkbox"/> 2 <input type="checkbox"/> 3 <input type="checkbox"/> 4 <input type="checkbox"/> 5 |
| – The objectives of these new biologics should be targeting mainly cytokines involved in Th2 allergic inflammation such as IL-4, IL-5, IL-13, and IL-31                                             | <input type="checkbox"/> 1 <input type="checkbox"/> 2 <input type="checkbox"/> 3 <input type="checkbox"/> 4 <input type="checkbox"/> 5 |
| – Dupilumab has the potential to become the new first-line reference treatment for patients with moderate-to-severe AD who are candidates to systemic treatment (with or without topical treatment) | <input type="checkbox"/> 1 <input type="checkbox"/> 2 <input type="checkbox"/> 3 <input type="checkbox"/> 4 <input type="checkbox"/> 5 |
| – According to results of phase II studies, JAK inhibitors will be a future treatment of AD                                                                                                         | <input type="checkbox"/> 1 <input type="checkbox"/> 2 <input type="checkbox"/> 3 <input type="checkbox"/> 4 <input type="checkbox"/> 5 |

AD: atopic dermatitis; SIT: specific immunotherapy; IL: interleukin; JAK: Janus kinase.
